# Supplementary material for: Facile synthesis of novel Ag3PO4tetrapods and the {110} facets-dominated photocatalytic activity
Source: Royal Society of Chemistry journal article supplement (doi:10.1039/c2ce26060c), 2012-10-18
Supplement: c2ce26060c.pdf [file c2ce26060c.pdf]

## Supporting Information for

# Facile synthesis of novel $\text{Ag}_3\text{PO}_4$ tetrapods and the {110} facets-dominated photocatalytic activity

Jun Wang,<sup>a</sup> Fei Teng,<sup>a\*</sup> Mindong Chen,<sup>a</sup> Jingjing Xu,<sup>a</sup> Yueqin Song<sup>b</sup> and Xiaolong Zhou<sup>b</sup>

<sup>a</sup> Jiangsu Key Laboratory of Atmospheric Environment Monitoring and Pollution Control, Innovative Research Laboratory of Environment and Energy, School of Environmental Sciences and Engineering, Nanjing University of Information Sciences and Engineering, Nanjing 210044, P. R. China.

<sup>b</sup> Petroleum Processing Research Center, East China University of Science and Technology, Shanghai 200237, P. R. China.

Corresponding author. Email: [tfwd@163.com](mailto:tfwd@163.com) (F. Teng); Phone/Fax: +86-25-58736689

## Experimental Section

**Chemicals:** All chemicals used were analytical grade reagents without further purification; silver nitrate ( $\text{AgNO}_3$ ), 85% phosphoric acid (85%  $\text{H}_3\text{PO}_4$ ), urea ( $\text{CO}(\text{NH}_2)_2$ ), titanium dioxide ( $\text{TiO}_2$ ) were purchased from Shanghai Reagents Company (Shanghai, China).

**Synthesis of  $\text{Ag}_3\text{PO}_4$  tetrapods:** In a typical procedure, 3 mmol of 85%  $\text{H}_3\text{PO}_4$  was dissolved in 80 mL of deionized water and 2.5 mmol of  $\text{AgNO}_3$  was added under stirring. Then, 37.5 mmol of urea were put into above solution. The resulting precursor was transferred into a Teflon-lined stainless steel autoclave and maintained at 80 °C for 24 h. After cooling to room temperature, the yellow precipitation was collected and washed with deionized water several times, and dried overnight at 60 °C.

**Synthesis of irregular  $\text{Ag}_3\text{PO}_4$ :** The irregular  $\text{Ag}_3\text{PO}_4$  particles were synthesized as previously reported.<sup>1</sup> Typically, appropriate amounts of raw powders of  $\text{Na}_2\text{HPO}_4$  and  $\text{AgNO}_3$  were thoroughly ground until the initial white changed to yellow. The SEM images and XRD pattern of irregular  $\text{Ag}_3\text{PO}_4$  were showed in Fig. S1B.

**Synthesis of N-TiO<sub>2</sub>:** Nitrogen doping was conducted as described previously.<sup>2</sup> P25 (0.5 g) was suspended in ethanol (5 mL). Then, urea (1 g) was dissolved in 2.5 mL ethanol and 0.5 mL H<sub>2</sub>O was added into the suspension. The mixture was stirred and heated to completely evaporate the solvent, followed by calcination in air at 400 °C for 4 h.

**Photocatalytic reactions:** Photocatalytic activities of the samples were evaluated by the photocatalytic decomposition of rhodamine B (RhB). Typically, 0.1 g of powders were put into a solution of RhB dye (100 ml, 8 mg/L), which was irradiated with a 300W Xe arc lamp equipped with an ultraviolet cutoff filter to provide visible light with  $\lambda \geq 420$  nm.

**Characterizations:** Scanning electron microscope (SEM) images of the samples were obtained on a Hitachi SU-1510 operated at 120kV. The samples were coated with 5-nm-thick gold layer before observation. The phase compositions of the samples were determined by X-ray diffractometer (Rigaku D/max-2550VB): using graphite monochromatized Cu K $\alpha$  radiation ( $\lambda = 0.154$  nm), operating at 40 kV and 50mA. The XRD patterns were scanned in the range of 20-80° (2 $\theta$ ) at a scanning rate of 5° min<sup>-1</sup>. Nitrogen adsorption-desorption isotherms were collected at 77 K using the NOVOE 4000 adsorption apparatus.

## Reference

- (1) Z. Yi, J. Ye, N. Kikugawa, T. Kako, S. Ouyang, H. S. Williams, H. Yang, J. Cao, W. Luo, Z. Li, Y. Liu and R. L. Withers, *Nat. Mater.*, 2010, **9**, 559.
- (2) D. Mitoraj and H. Kisch, *Angew. Chem., Int. Ed.*, 2008, **47**, 9975.

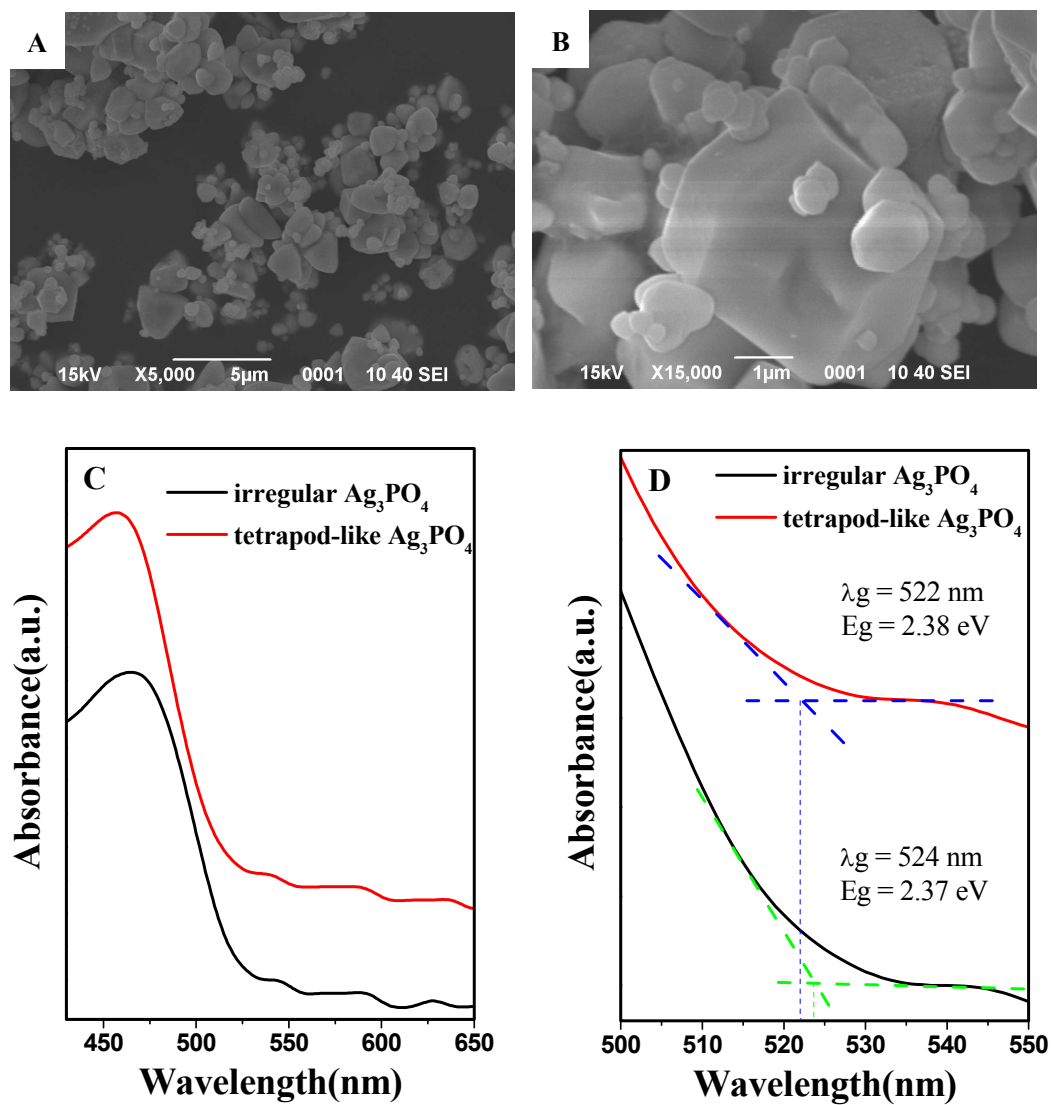

**Fig. S1** (A, B) SEM images of irregular  $\text{Ag}_3\text{PO}_4$ ; (C,D) UV-visible spectra of T- $\text{Ag}_3\text{PO}_4$  and irregular  $\text{Ag}_3\text{PO}_4$ .

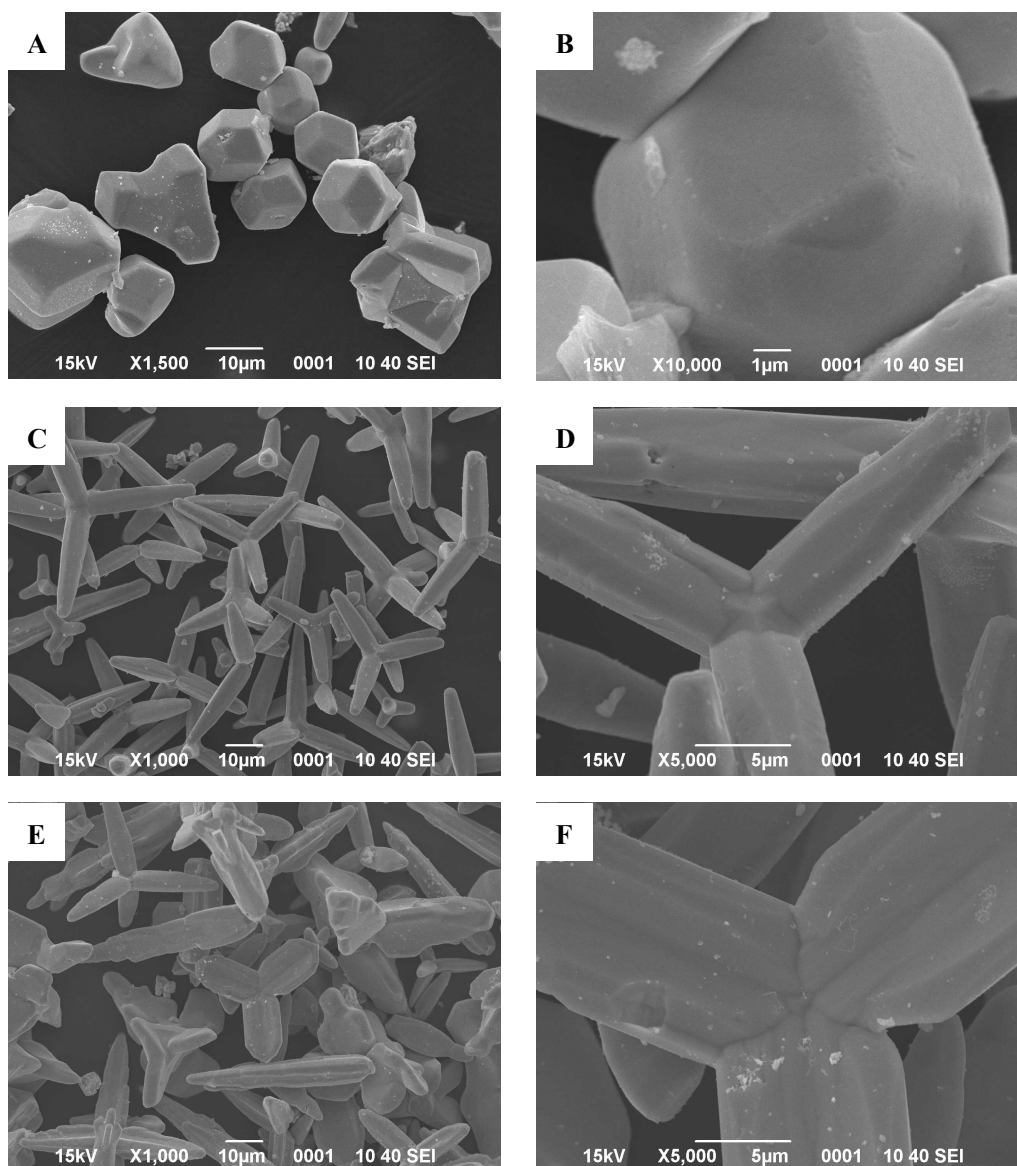

**Fig. S2** SEM images of  $\text{Ag}_3\text{PO}_4$  microcrystals synthesized at different molar ratios of urea to  $\text{AgNO}_3$ : (A, B) 10; (C, D) 15; (E, F) 20.

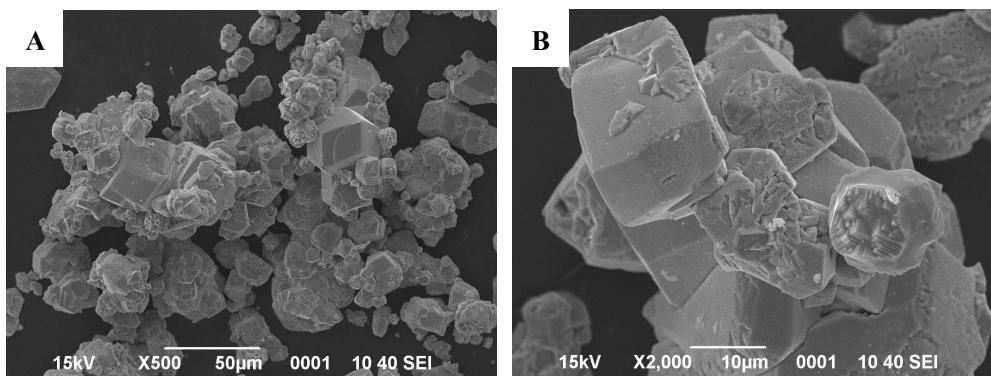

**Fig. S3** SEM images of  $\text{Ag}_3\text{PO}_4$  microcrystals synthesized via an open refluxing system.

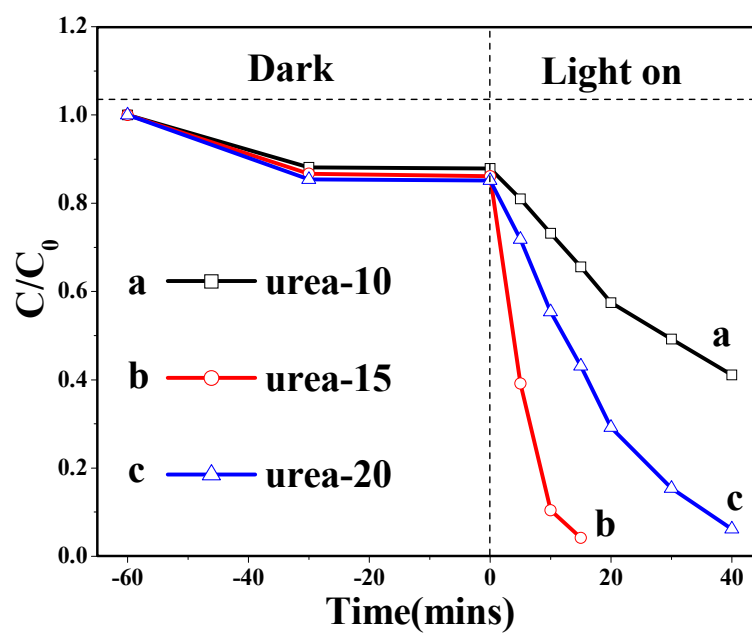

**Fig. S4** Photocatalytic activities of  $\text{Ag}_3\text{PO}_4$  synthesized at different molar ratios of urea to  $\text{AgNO}_3$ : (a) 10, (b) 15, (c) 20.

**Table S1** The textural properties of the polyhedrons and tetrapods.

| Samples     | Surface areas<br>(m <sup>2</sup> /g) | Pore volume<br>(cm <sup>3</sup> /g) | Pore Diameter<br>(nm) |
|-------------|--------------------------------------|-------------------------------------|-----------------------|
| Polyhedrons | 29.851                               | 0.023                               | 3.113                 |
| Tetrapods   | 37.952                               | 0.030                               | 3.112                 |

Surface area, calculated by the Brunauer–Emmett–Teller method; Pore sizes, calculated by the Barret–Joyner–Halender method.
